# Supplementary material
Source: publisher figshare collection journal article supplement (https://sage.figshare.com/ndownloader/files/14441378)
Supplement: Supplementary file 1 [file 14441378]

**Supplemental Digital Content**

FDA Dosing Recommendations for Dabigatran and Rivaroxaban

| **Direct Oral Anticoagulant** | **FDA Dosing Recommendations** |
| --- | --- |
| Dabigatran | 1. eGFR > 30 mL/min: 150mg BID dosing is *correct* 2. 15 ≤ eGFR ≤ 30 mL/min: 75mg BID dosing is *correct (per manufacturer dosing recs and FDA) but not recommended per the American Geriatric Society. According to the VA national criteria for use, this dose should not be used due to lack of clinical data.* 3. eGFR < 15 mL/min is *contraindicated* |
| Rivaroxaban | 1. eGFR > 50 mL/min: 20mg daily dosing is *correct* 2. 30 < eGFR ≤ 50 mL/min: 15mg daily dosing is *correct* 3. 15 ≤ eGFR ≤ 30 mL/min: 15mg daily dosing is *correct (per manufacturer dosing recs and FDA) but not recommended per the American Geriatric Society. According to the VA national criteria for use, this dose should not be used due to lack of clinical data.* 4. eGFR < 15 mL/min is *contraindicated* |
| FDA: Food and Drug Administration; eGFR: estimated glomerular filtration rate | |
